# Supplementary material
Source: PubMed Central journal article supplement (PMC3767563)
Supplement: 1303170110_pnas.201303170SI.pdf [file 1303170110_pnas.201303170SI.pdf]

# Supporting Information

Stolk et al. 10.1073/pnas.1303170110

## SI Materials and Methods

**Experimental Setting.** Each pair of participants engaged in two types of real-time sequential interactive tasks, a communicative task and an instrumental task (Fig. 1), with the order of presentation of the two tasks counterbalanced over participant pairs. The interactions between participants took place on a digital grid, visually presented and computer-controlled. Each participant controlled the movements of a token on the game board by means of a hand-held controller. Four buttons controlled by the right thumb moved the token to the left, right, up, and down, respectively; the right shoulder button rotated the token 90° clockwise; and the left shoulder button was used as a start and end button. During the experiment, one participant was supine on a bed inside a magnetically shielded and sound-proof room. This participant was facing a projection screen and holding a magnetoencephalography (MEG)-compatible hand-held controller. The visually presented digital game board subtended a visual angle of  $\sim 2^\circ$  to minimize eye movements. The other participant sat outside the magnetically shielded room, in front of a 19-inch liquid-crystal-display monitor, using a structurally identical hand-held controller and wearing a sound-proof headset.

**Experiment Details.** An experiment lasted about 3 h with the following sequence of experimental sessions: preparation of the participants [delivery of instructions and placement of electrodes for electrocardiogram (ECG) and electrooculogram (EOG);  $\sim 20$  min]; training with using the hand-held controller ( $\sim 15$  min); training in the first interactive game (20 trials;  $\sim 20$  min); performance/recording of the first interactive game (80 trials;  $\sim 45$  min); training in the second interactive game (20 trials;  $\sim 20$  min); performance/recording of the second interactive game (80 trials;  $\sim 45$  min); and acquisition of an MR anatomical scan ( $\sim 15$  min). Task events within each training and performance sessions were programmed using Presentation 9 (Neurobehavioral Systems) and run on a Windows XP personal computer handling visual presentation, receiving triggers from the hand-held controllers, and marking task events through triggers sent to the MEG-acquisition system.

**Communicative Interaction.** This task involves two players alternating between the roles of Communicator and Addressee across successive trials. At trial onset, each player is assigned a role and a token (Fig. 1, *Left*, epochs A and B: role and token assignment). After a baseline epoch consisting of an empty grid display (epoch C: baseline period), the Communicator (and the Communicator only) is shown the target configuration of that trial (epoch D: planning). The target configuration contains the tokens of the Communicator and the Addressee at the grid locations and orientations that they should have at the end of the trial. The Communicator knows that the Addressee does not see the target configuration and that he cannot move the Addressee's token. Therefore, the Communicator needs to communicate to the Addressee the location and orientation that her token should have at the end of the trial. To comply with the task requirements, the Communicator also needs to ensure that at the end of his turn his token is at the location and orientation specified by the target configuration. In this game, the only means available to the Communicator for communicating with the Addressee is by moving his own token around the grid, namely horizontal translations, vertical translations, or clockwise rotations. Both Communicator and Addressee also know that the Communicator has unlimited time available for planning his moves but only 5 s for

moving his token on the grid. The Communicator signals his readiness to move by pressing the start/stop button. At this point, the target configuration disappears, the Communicator's token appears in the center of the grid, and he can start moving his token (epoch E: movement). After 5 s, or earlier if the Communicator hits the start/stop button again, the Communicator's token cannot move further and the Addressee's token appears in the center of the grid. This event indicates that the Addressee has acquired control over her token. The Addressee has unlimited time to infer the target location and orientation of her token on the basis of the observed movements of the Communicator (epoch F: planning). After the Addressee presses the start/stop button, she has 5 s to move her token (epoch G: movement). Finally, after 5 s, or earlier if the Addressee hits the start/stop button again, the same feedback is presented to both players in the form of a green tick or red cross (positive or negative feedback, respectively; epoch H: feedback). The feedback indicates whether the participants had matched the location and orientation of their tokens with those of the target configuration.

Two important features of this communicative task should be emphasized. First, the Addressee cannot solve the communicative task by reproducing the movements of the communicator's token. Rather, the Addressee needs to disambiguate communicative and instrumental components of the communicator's movements and find some relationship between the communicator's movements and their meaning. Second, there are no a priori correct solutions to the communicative task, nor is there a limited set of options from which the Communicator could choose.

**Instrumental Interaction.** In this task, two players alternated between the roles of Salesman and Roadworker across successive trials. At trial onset, each player is assigned a role and a token (Fig. 1, *Right*, epochs A and B: role and token assignment). After a baseline epoch consisting of an empty grid display (epoch C: baseline period), only the Salesman is shown the target configuration of that trial (epoch D: planning). The target configuration contains the tokens of the Salesman and the Roadworker. Differently from the communicative task, the target configuration of the instrumental task defines the trial-specific conditions of a problem that the Salesman needs to solve individually. Namely, the goal of the Salesman is to select a path of translations of his token through the grid, passing through a set of waypoints, in the following sequence: point 1, starting position in the center of the grid (where the Salesman's token is placed at the end of the planning phase); point 2, location of the Salesman's token as displayed in the target configuration (labeled as Salesman's "home" for clarity); point 3, location and orientation of the token displayed in the target configuration that is different from the Salesman's token (labeled as the "outlet" for clarity); and point 4, location of the Salesman's home. The Salesman needs to satisfy a further requirement, namely he needs to pass exactly twice through one grid location different from the Salesman's home (that is also meant to be visited twice, see points 2 and 4 above). As in the communicative task, during the instrumental task, the Salesman has unlimited time available for planning his moves but only 5 s for moving his token on the grid. The Salesman signals his readiness to move by pressing the start button. At this point, the target configuration disappears, the Salesman's token appears in the center of the grid, and he can start moving his token (epoch E: movement). After 5 s, or earlier if the Salesman hits the start button again, the Salesman's token cannot move further and the Roadworker's token appears in the center of the grid. This event indicates that the

Roadworker has acquired control over her token. Similarly to what happened for the Addressee in the communicative task, the task of the Roadworker in the instrumental task depends on the movements of the coplayer (i.e., Salesman). However, differently from the communicative task, in the instrumental task, the Roadworker uses inadvertently displayed features of the Salesman's movements to solve her task. Namely, the Roadworker is asked to move to the grid location visited twice by the Salesman, excluding the Salesman's house. The Roadworker has unlimited time to decide where to move her token on the basis of the observed movements of the Salesman (epoch F: planning). After the Roadworker presses the start button, she has 5 s to move her token (epoch G: movement). Finally, after 5 s, or earlier if the Roadworker hits the start button again, feedback is presented to the two players in the form of a green tick or red cross (positive or negative feedback, respectively; epoch H: feedback). The feedback indicates to each player independently whether they had complied with the requirements of the instrumental task on that trial.

**Manipulations of Task Difficulty.** In both the communicative and instrumental task, we increased task difficulty across successive trials (for examples, see Fig. S1*A* and *B*). In the communicative task, the rationale of this intervention was to drive participants to continuously create new communicative behaviors, rather than exploiting already-established communicative conventions. Communicative-task difficulty was increased by introducing deliberate mismatches between the geometrical characteristics of the tokens of Communicators and Addressees. For instance, when the Communicator's token was a circle and the Addressee's token was a triangle (Fig. S1*A*, middle column), then the Communicator needed to find a new way to indicate to the Addressee the orientation of her token, because rotations of the circle token were not visible. A further level of difficulty could be introduced by using a triangular token pointing outward the grid as the Addressee's target configuration, the Communicator's token being a circle (Fig. S1*A*, right column).

In the instrumental task, the rationale was to match the surface behavior evoked in the communicative task. Instrumental-task difficulty was also increased by introducing triangular shaped tokens for the Roadworker (the outlet). Outlets with a triangular token required the Salesman to leave the outlet along the direction to which the token was pointing and to enter it from any but the same side ("one-way rule"; Fig. S1*B*, middle column). A further level of difficulty could be introduced by using a triangular token as the Salesman's home because, then, the same rule would also apply to that location (Fig. S1*B*, right column). Triangular tokens would also increase task difficulty for the Roadworker. Namely, if the Roadworker's token was a triangle, her task would then involve rotating her token such that the triangle pointed to the direction of the movement of the Salesman's token when it left that revisited location the second time.

**Behavioral Data Analysis.** We considered mean planning times, mean movement times, and mean number of moves of Communicator and Addressee in the communicative task and Salesman and Roadworker in the instrumental task (Fig. S1). These dependent variables were calculated for each of the 24 pairs of participants and for each of the two tasks and compared statistically by means of paired *t* tests (two-tailed  $\alpha$ -level: 0.05). We also compared the mean time spent on target locations and on nontarget locations (within-movement epochs E; Fig. 1) separately for each game, in a two-way ANOVA with task setting (communicative, instrumental) and location (target, nontarget) as factors. In the communicative task, the target refers to the Addressee's target location that had to be communicated by the Communicator. In the instrumental task, the target was defined as the location that had to be visited twice by the Salesman and reached by the Roadworker. Nontarget locations were defined as

the other grid locations visited by the Communicator or by the Salesman. We considered pairs of participants as the unit of observation for the statistical analysis because in the communicative task, performance is dependent on both elements of a pair, and, for consistency, we adopted the same approach with the instrumental task. Finally, we considered the percentage of correct trials achieved by the participants in the communicative and instrumental task. Given the task characteristics, correct outcome could be defined on the basis of individual performance in the instrumental task but only on the basis of joint performance in the communicative task. Accordingly, we refrained from directly comparing performance between the two tasks.

**MEG Source Reconstruction.** Participant-specific anatomical MRIs were used to linearly transform a 3D template grid (10-mm spacing) in Montreal Neurological Institute coordinates to the coordinate system specific to the participant's head. To this end, we used SPM8 (Statistical Parametric Mapping; [www.fil.ion.ucl.ac.uk/spm](http://www.fil.ion.ucl.ac.uk/spm)) to estimate the affine transformation between the two coordinate systems. We subsequently applied the inverse of this transformation to obtain grid positions at matched brain locations across participants. For each of the positions on that grid, neural activity was estimated using a frequency-domain "beamforming" approach. This method constructs spatial filters for each of the grid positions, passing the activity from the location of interest with unit gain, while maximally suppressing activity from all other possible sources of neural and nonneural electrical activity. The beamformer spatial filter is constructed from the lead field and the cross-spectral-density matrix of the data. The lead field is the physical forward model of the field distribution calculated from an assumed source at a given location and the participant-specific volume-conduction model of the head. Here, we used a single-shell volume-conduction model of the brain, based on the brain boundary determined by the segmented anatomical MRI and computed the lead fields according to ref. 1. In this study, we considered spatial filters generated by using condition- and participant-specific lead fields. This approach takes into account and controls for differences in head position and orientation of the sources relative to the MEG sensors, leading to more consistent and less biased estimates of source-level effects across participants and conditions.

**General Assessments of Neurophysiologic Data.** The participant's head position relative to the MEG sensors was measured before, during, and after each session using localization coils, placed at the nasion and the left and right ear canals. Before the second session, each participant was asked to reposition his/her head in the same location and orientation as the position measured before the first session, using a real-time head localizer tool (2). To test for systematic differences in head positions, we computed the difference in the position of the center of the head between the two sessions for all participants. The average position difference along the axis accounting for most of the variance was  $0.6 \pm 0.4$  mm (mean  $\pm$  SEM), an indication of strong intersession consistency in head location.

Electrocardiogram (ECG) traces and vertical and horizontal electrooculogram (EOG<sub>v</sub> and EOG<sub>h</sub>) traces were recorded during task performances, using three pairs of 10-mm diameter Ag-AgCl surface electrodes with bipolar montages. The ECG showed no statistically significant differences in heart rate [communicative setting  $69.2 \pm 1.8$  bpm versus instrumental setting  $69.5 \pm 2.1$  bpm (mean  $\pm$  SEM)]. The EOG traces showed no statistically significant differences in overall signal energy: Communicator vs. Salesman,  $t(23) < 0.8$ ; and Addressee vs. Roadworker,  $t(23) > -1.4$  (paired samples *t* tests).

To provide a more stringent filter against the effects of eye movements on the spatial distribution of task-related effects and on the temporal dynamics of source-reconstructed activity, we directly

removed continuous eye movement estimates from the source-reconstructed MEG data before further analyses. The contribution of vertical ( $EOG_v$ ) and horizontal ( $EOG_h$ ) electrooculographic signals was estimated in the same time segments and frequency bands as that of the source-reconstructed signal and removed from that signal, according to the following procedure:

$$Y = b_0 C + b_1 EOG_v + b_2 EOG_h + E,$$

where  $Y$  is source data over  $K$  trials,  $b_0$  is the intercept constant,  $C$  is a  $K$  vector of ones, and  $b_1$  and  $b_2$  are regression coefficients for eye movement-related activity recorded at the vertical and horizontal EOG channels, respectively.  $E$  is unexplained model error. The least-squares solution to the linear equation,

$$\min \|Y - b_0 C - b_1 EOG_v - b_2 EOG_h\|^2,$$

then results in three  $b$  values per voxel (two for the EOG channels and one constant). Subsequently, the estimated contributions of the EOG regressors to the source reconstructed spectral power were removed from the original single-trial source data:

$$Y_{clean} = Y - b_1 EOG_v - b_2 EOG_h,$$

1. Nolte G (2003) The magnetic lead field theorem in the quasi-static approximation and its use for magnetoencephalography forward calculation in realistic volume conductors. *Phys Med Biol* 48(22):3637–3652.
2. Stolk A, Todorovic A, Schoffelen JM, Oostenveld R (2013) Online and offline tools for head movement compensation in MEG. *Neuroimage* 68:39–48.

where  $Y_{clean}$  represents the data with eye movement-related variance removed (and with the intercept constant remaining in the data). Fig. S3 illustrates the spatial distribution of beta values estimated for each EOG channel (vertical and horizontal) and epoch type (planning and observation of actions). It can be seen that the EOG signal in the 55- to 85-Hz band was significantly correlated with source-reconstructed activity from orbitofrontal cortex, most likely because of both locations picking up activity of the extraocular muscles involved during saccades (3, 4).

**Trial-by-Trial Coupling Between Baseline Neural Activity and Task Performance.** The source level trial-by-trial  $\gamma$ -band powers were ensured free from head movements (2) before computing trial-by-trial correlations between  $\gamma$ -band activity and planning times in a subsequent trial epoch. The planning times (i.e., Communicator/Salesman and Addressee/Roadworker in trial epochs D and F, respectively) were log-transformed, and both dependent variables were normalized per task role separately before concatenation (with equal number of trials per interaction type) and subsequent correlation. The significance of the coupling was tested by testing the  $z$ -transformed single-subject correlations against null at the group level.

3. Carl C, Açıık A, König P, Engel AK, Hipp JF (2012) The saccadic spike artifact in MEG. *Neuroimage* 59(2):1657–1667.
4. Keren AS, Yuval-Greenberg S, Deouell LY (2010) Saccadic spike potentials in gamma-band EEG: characterization, detection and suppression. *Neuroimage* 49(3):2248–2263.

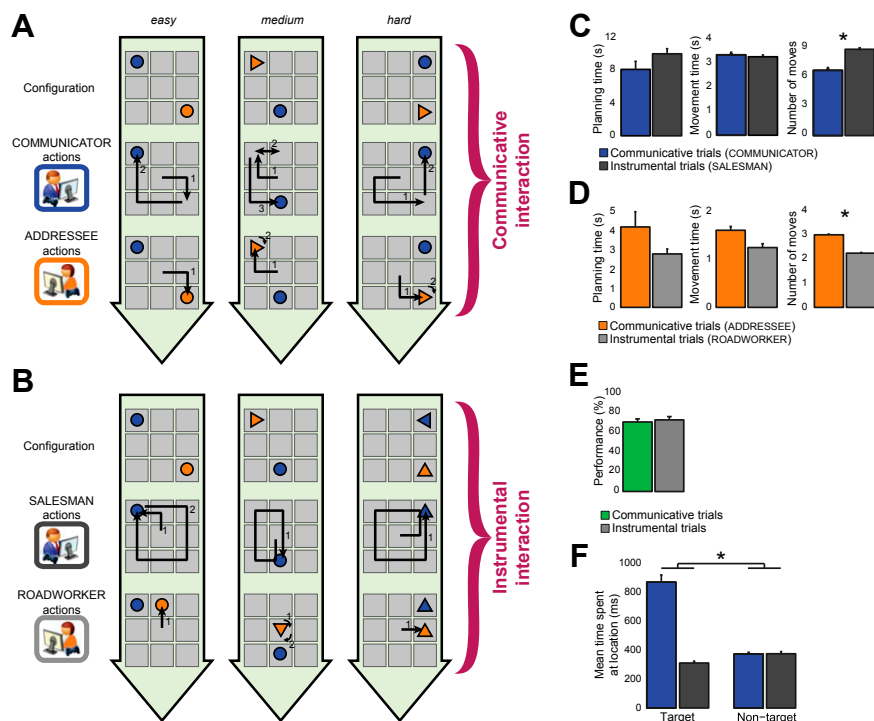

**Fig. S1.** Representative examples (A and B) and summary statistics (C–F) of interactive behaviors in the communicative and instrumental tasks. (A and B) Each column shows representative examples of interactive behaviors at three different levels of task difficulty, separately for communicative interactions (A) and instrumental interactions (B). The first row describes the initial problem faced by the Communicator (A) and by the Salesman (B). This task epoch corresponds to epoch D in Fig. 1. The second row in A and B describes the actions of the Communicator/Salesman (see epoch E in Fig. 1) [i.e., horizontal/vertical translations (arrows), sequences of translations (double arrows), return translations (broken arrows), and 90° clockwise rotations (small curved arrows)]. The third row in A and B describes the actions of the Addressee/Roadworker (see epoch H in Fig. 1). Below, we provide an account of some frequently observed interactive behaviors. “Communicative interaction—Easy”: the Communicator moves toward the Addressee’s target grid location (orange token), pauses, and then moves his token to the Communicator’s own target location (blue token). The pause is dysfunctional to the Communicator’s goal of reaching his target. The Addressee infers that this instrumentally dysfunctional behavior performs a communicative function, marking the location that her token should have on the grid. “Communicative interaction—Medium”: the Communicator moves toward the Addressee’s target grid location, pauses, and then moves one grid location along the direction the triangle is pointing to, moves back to the Addressee’s target location, pauses again, and then moves to the Communicator’s own target location. The “wiggling” signal (i.e., moving one grid location aside and back, depicted by the double arrow) is a more complex instrumentally dysfunctional behavior that assumes a communicative value, providing the Addressee with an indication for the orientation that her token should have on the grid. “Communicative interaction—Hard”: the Communicator makes a detour before going toward the Addressee’s target location, pauses at the Addressee’s target location, and then goes to the Communicator’s own target location. Marking the orientation of a token pointing outward on the grid cannot be mapped to the communicative behaviors described above. Communicators solve this problem by exploiting the conversational context set by the previous examples, namely avoiding to produce “wiggles,” and marking this absence with an instrumentally dysfunctional detour. The absence of an orientation signal (the wiggles), together with an ostensive cue marking the salience of that absence (the detour), provides a new communicative signal that is interpreted as indicating a token orientation that cannot be marked by the “wiggle strategy.” Please note that this is only one among a series of possible solutions. For instance, some Communicators use the number of subsequent wiggles to mark the number of clockwise rotations that the Addressee needs to make to achieve the target orientation of her token. “Instrumental interaction—Easy”: the Salesman moves toward the Salesman’s home (blue token) and returns to the grid location from which he came and has now visited twice. He then moves toward the outlet (orange token) and subsequently to his home again, while avoiding revisiting another grid location. There are three alternative solutions, of which two include the revisiting of the center left grid location instead. The Roadworker moves toward the grid location visited twice by the Salesman to achieve her objective (“repairing” the grid location visited twice by the Salesman). “Instrumental interaction—Medium”: the Salesman visits the home location, then the outlet while obeying the one-way rule associated with the triangle’s orientation (a triangular token required the Salesman to leave that grid location along the direction to which the token was pointing and to enter it from any but the same side), and subsequently moves toward the home while revisiting the center field (the start at the center grid counts as one visit to this location). The Roadworker stays at the center grid but rotates her token such that the triangle points to the direction of movement of the Salesman’s token when it left that revisited location the second time, thus achieving her objective (*SI Materials and Methods, Manipulations of Task Difficulty*). “Instrumental interaction—Hard”: although the Salesman now has to move along the one-way rules of two tokens, there is only one solution to his problem. The Salesman moves to the right, so he can enter and leave his home along the direction of the triangle’s point, and then moves around the grid toward the outlet while not revisiting any other grid location. He subsequently enters and leaves the outlet along the direction that the triangle is pointing to and revisits a previously visited grid location for the first time before returning home. The Salesman does not need to match any orientation with his own token. The Roadworker’s token is triangular-shaped and, therefore, needs to match the Salesman’s movement direction (similar to the Medium example). However, because her token’s orientation at start already matches the target orientation of this trial, she moves toward the Salesman’s revisited location without making any additional rotations. (C) Planning times (epoch D in Fig. 1), Movement times (epoch E in Fig. 1), and Number of moves of Communicators and Salesmen. Note that the Communicator and Salesman Movement times determine the Addressee and Roadworker observing times. (D) Planning times (epoch F in Fig. 1), Movement times (epoch G in Fig. 1), and Number of moves of Addressees and Roadworkers. Note that Addressees make more moves than Roadworkers, whereas Communicators make fewer moves than Salesmen. Therefore, task-related differential effects common to Communicators and Addressees (Fig. 2E) cannot be driven by these behavioral differences in task performance. (E) Percentage of successful trials in the communicative and instrumental task. Note that, in the communicative task, successful performance is conditional on both players (green bar); the same parameter is provided for the instrumental task (gray bar). (F) Mean time spent at grid locations within the movement intervals, separately for target and nontarget locations (in each case the average per trial is taken). In the communicative trials, target refers to the Addressee’s target grid location that had to be communicated by the Communicator. For the instrumental trials, target refers to the location that was meant to be visited twice by the Salesman. The nontarget locations refer to other visited locations on the digital grid. Error bars indicate  $\pm 1$  SEM. \* $P < 0.001$ .

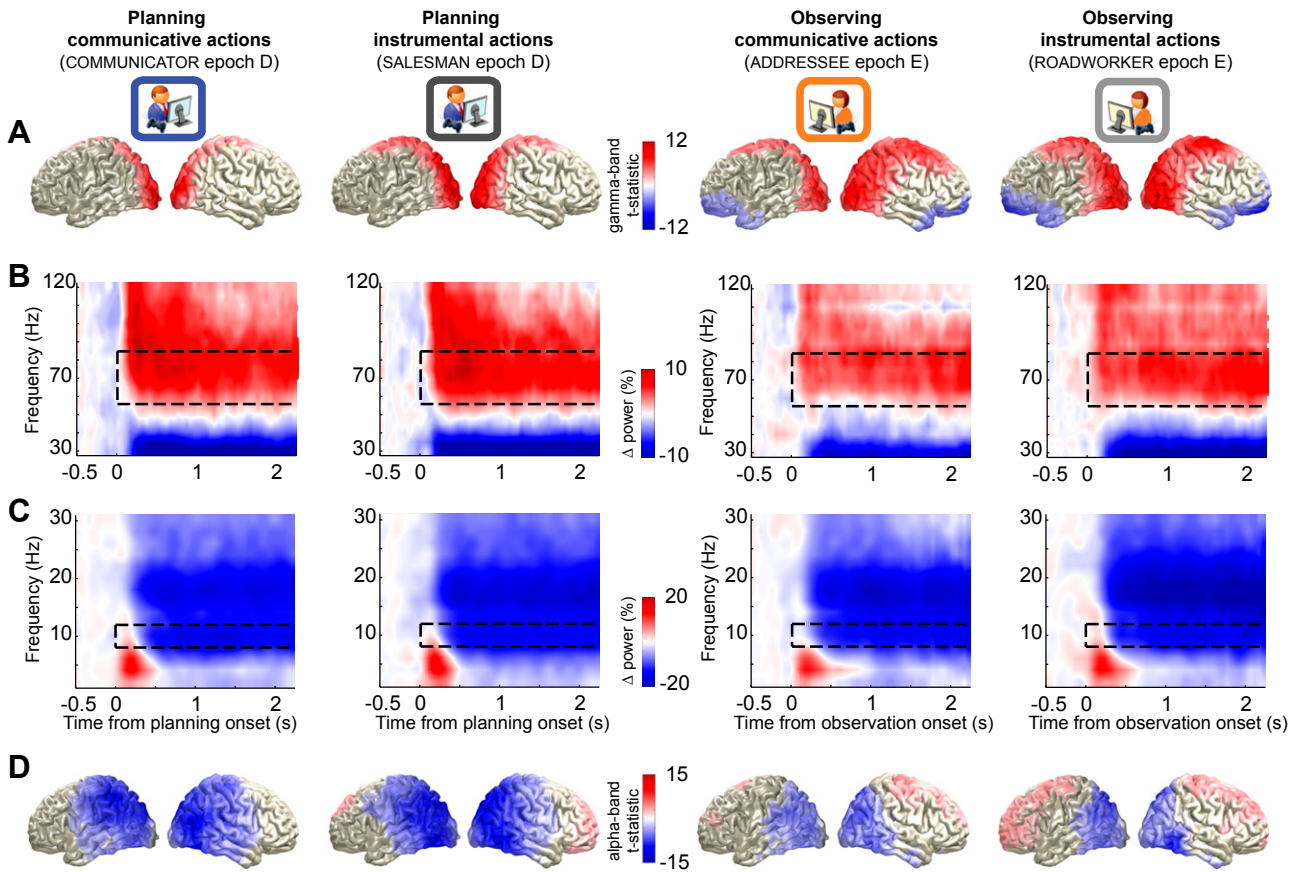

**Fig. S2.** Spatial, spectral, and temporal profile of task-related neural activity (A–D). The task-evoked modulations in signal power (relative to baseline) indicate highly comparable patterns of induced neural activity in the sensorimotor system (occipital and posterior parietal cortex) within the two planning epochs (Communicator and Salesman; first and second column) and within the two observation epochs (Addressee and Roadworker; third and fourth column). The top two rows (A and B) represent the spatial, temporal, and spectral characteristics of changes in high-frequency power (>30 Hz) evoked by the task. This analysis was based on 200-ms windows tapered with a set of three orthogonal Slepian tapers. The bottom two rows (C and D) represent similar characteristics of changes in low frequency power (<30 Hz) evoked by the task. This analysis was based on 500-ms windows and a single Hanning taper. (A) Lateral views on functional source reconstructions of  $\gamma$  (55–85 Hz) activity evoked during the whole of the planning and observation epochs contrasted with the endmost second of their preceding baseline periods. (B) The power responses resolved in time and frequency in voxels that survived the multiple comparison statistics as a positive cluster in A ( $P < 0.05$ ). (C) The power responses resolved in time and frequency in voxels that survived the multiple comparison statistics as a negative cluster in D ( $P < 0.05$ ). (D) Lateral views on functional source reconstructions of alpha (8–12 Hz) activity evoked during the whole of the planning and observation epochs contrasted with the endmost second of their preceding baseline periods.

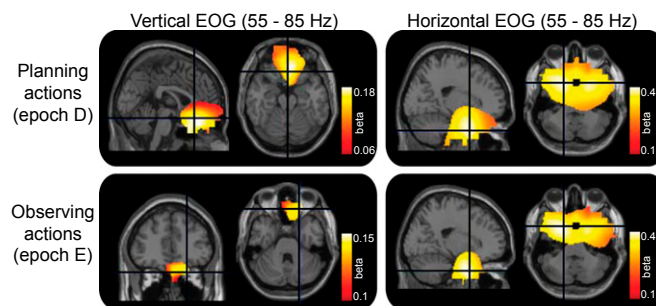

**Fig. S3.** Contributions from eye movement during the planning (top row) and observation of actions (bottom row) were estimated and regressed out from the source-reconstructed data before further analysis. The normalized beta-weights (obtained by normalizing the source and EOG data before multiple linear regression analysis) reveal the spatial structure of source-reconstructed activity (i.e., around the extraocular muscles, that is significantly correlated with vertical and horizontal EOG activity in the 55- to 85-Hz frequency range). The threshold of the color axis was raised to resolve the spatial structure around the statistically significant peaks ( $t$  value,  $>8$ ;  $P < 0.05$ ; multiple comparison-corrected). The upper  $\beta$  values are the peaks.

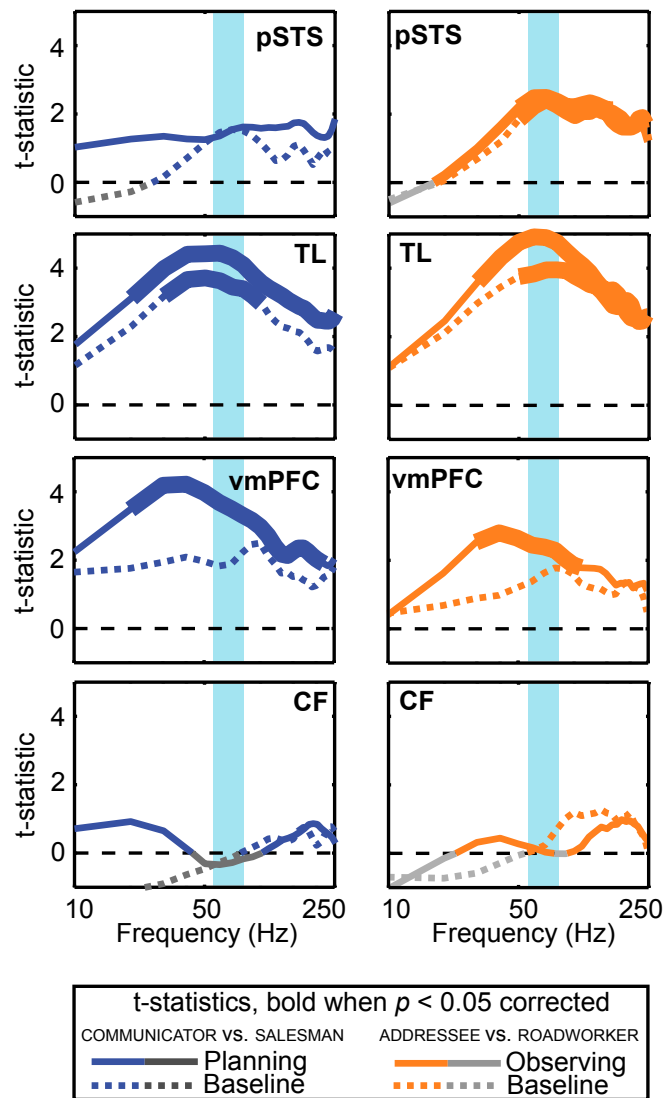

**Fig. 54.** The  $t$  statistics per frequency bin indicate that the differences in (absolute) neural activity between the communicative and instrumental task epochs were statistically most pronounced in the 55- to 85-Hz  $\gamma$  band (in cyan). The graphs follow the presentation order of the power spectral densities in Fig. 2 *B* and *D*. The solid lines represent the  $t$  statistics derived from group-level paired  $t$  tests on source-reconstructed cerebral neural activity evoked during the whole of the planning and observation epochs. The dashed lines represent the same contrasts but now regarding the endmost second of preceding baseline periods during which only the empty grid was presented.

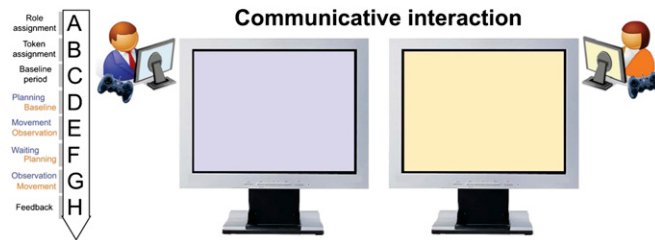

**Movie S1.** Representative example of interactive behavior in the communicative task. This movie illustrates the average timing of the participants during this task, with 1 s added before and after each transition across trial epochs to facilitate vision of the trial sequence. During a communicative interaction, a target configuration was shown to the Communicator only (Communicator epoch D). To achieve that target configuration, the Communicator needed to convince the Addressee to move her token (in orange) to the desired target location and orientation. The Communicator could achieve this only by moving his token (in blue) across the digital grid, knowing that the Addressee will observe those movements (Addressee epoch E) to decide where and how to move her token (Addressee epoch G). The success of a communicative interaction relied on the Communicator designing an action that could be understood by the Addressee (during planning in epoch D) and on the Addressee inferring the Communicator's intentions (during observation in epoch E).

[Movie S1](#)

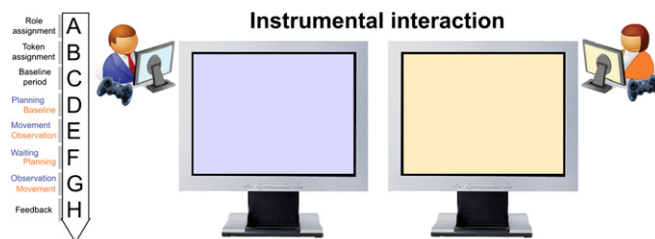

**Movie S2.** Representative example of interactive behavior in the instrumental task. This movie illustrates the average timing of the participants during this task, with 1 s added before and after each transition across trial epochs to facilitate vision of the trial sequence. During an instrumental interaction, the Salesman's objective was to travel between two grid locations while visiting only one grid location twice (Salesman epoch D), knowing that the Roadworker will observe those movements (Roadworker epoch E) to decide where and how to move to the grid location visited twice (Roadworker epoch G). A triangular token required the Salesman to leave that grid location along the direction to which the token was pointing and to enter it from any but the same side (one-way rule). Concomitantly, it required the Roadworker to rotate her token such that the triangle pointed to the direction of the movement of the Salesman's token when it left the revisited location the second time. The success of an instrumental interaction relied on the Salesman designing an action according to pre-established rules (during planning in epoch D) and on the Roadworker implementing her assigned rules according to the behavior of the Salesman (during observation in epoch E).

[Movie S2](#)

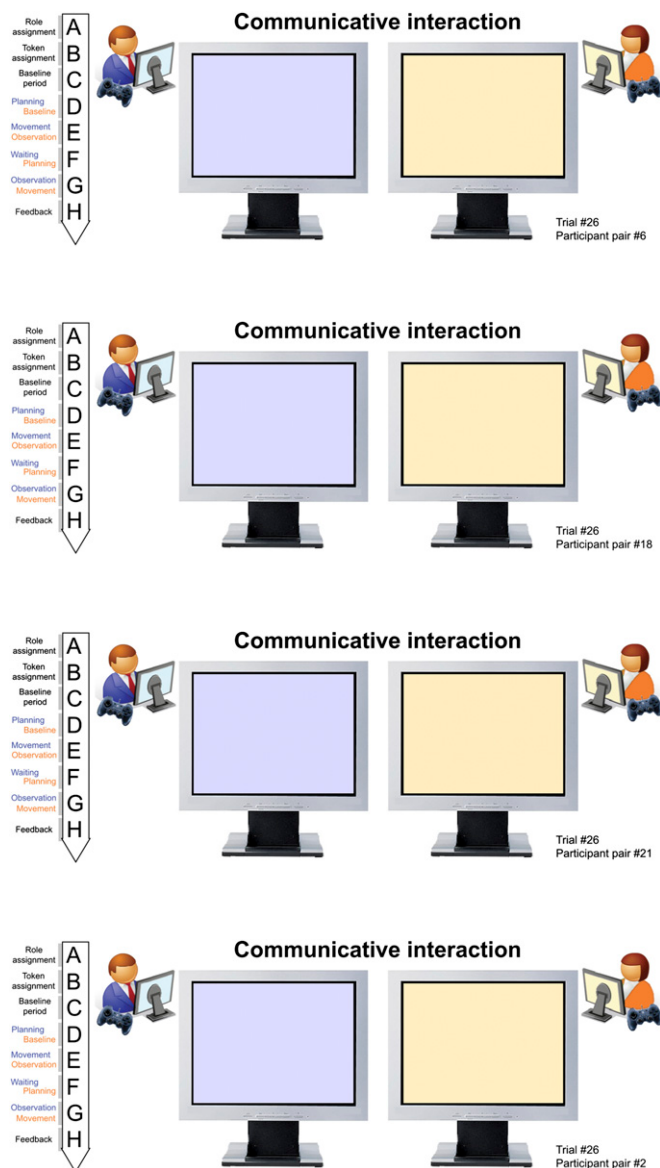

**Movie S3.** This movie and [Movie S4](#) and [S5](#) reproduce exactly the behavior of the participants recorded during the trials on display, with 1 s added before and after each transition across trial epochs to facilitate vision of the trial sequence. Interactive behaviors evoked during trial 26 of the communicative task in four different participant pairs. Three successful pairs showed different communicative behaviors, illustrating how different conversational contexts may evoke different communicative behaviors with the same meaning. For instance, subjectively interpreted, the Communicator of pair 6 briefly pauses on the target location and then uses an “exit-point strategy” to indicate orientation, leaving that grid location along the direction to which the triangular token needs to point (A). Communicator 18 uses an “entry- and exit-point strategy,” making two additional rotations at the target location to emphasize the need for the Addressee to rotate (B). Communicator 21 moves to the target location and rotates as many times as the Addressee has to rotate (C). The interpretation of those behaviors is by no means trivial. For instance, in participant pair 2 (D), the Communicator makes a similar communicative behavior (two rotations at the target location) as the Communicator of pair 18 (B), but it is interpreted differently by the respective Addressees. Arguably, Addressee 2 may have inferred from the Communicator’s actions that she needed to rotate twice, similar to the strategy used by pair 21.

[Movie S3 \(A\)](#)

[Movie S3 \(B\)](#)

[Movie S3 \(C\)](#)

[Movie S3 \(D\)](#)



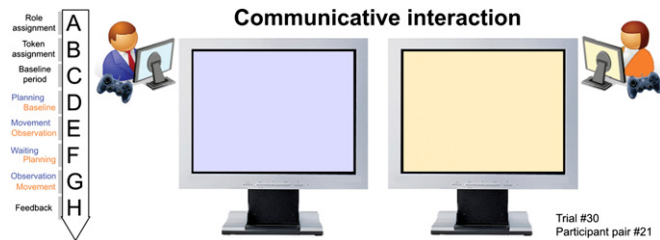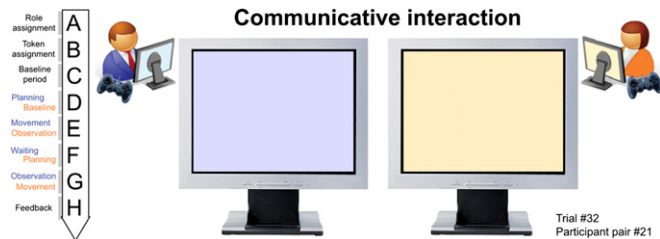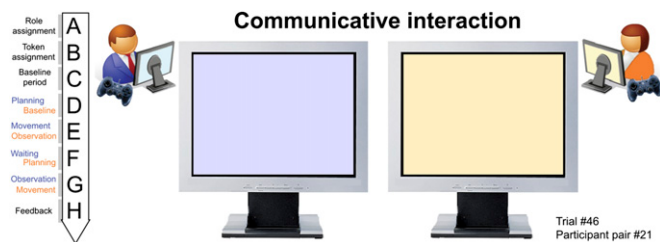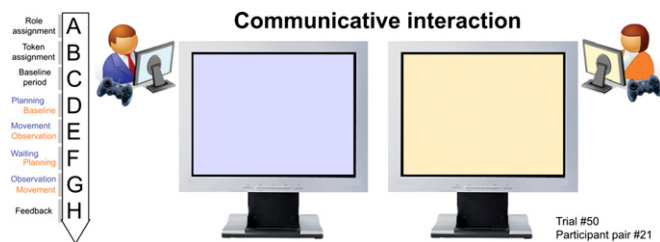

**Movie S4.** Interactive behaviors evoked during trials 30, 32, 46, and 50 of the communicative task by the same participant pair (pair 21). A communicative behavior can have different meanings in different trials, depending on the current conversational context of a pair. For instance, in trial 30, the Communicator uses an exit-point strategy to indicate the orientation of the Addressee's triangular token, leaving the relevant grid location along the direction where the triangular token needs to point (A). In trial 32 (and onward), the same player has started to use a wiggle strategy to indicate the target orientation of the triangle (B). In trial 46, the same player is presented (for the first time) with a goal configuration involving a triangle that points "outward." In this trial, the wiggle is absent (C). This absence is successfully interpreted by her Addressee as indicating an unusual orientation of the triangle. The success of this communicative interaction is even more remarkable given that in trial 30, the Communicator produced a similar behavior to mean a different goal configuration. In this pair of participants, the absence of a wiggle as a mark for an outward pointing triangle is used in a few more trials (e.g., trial 50 (D)), until a different strategy is selected in later trials (not shown).

[Movie S4 \(A\)](#)

[Movie S4 \(B\)](#)

[Movie S4 \(C\)](#)

[Movie S4 \(D\)](#)

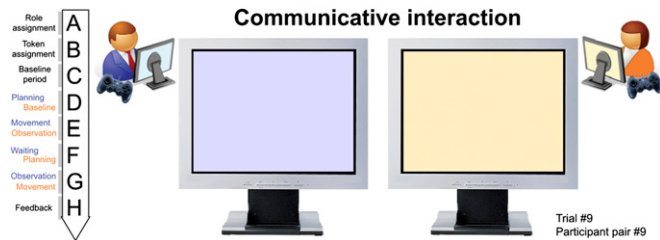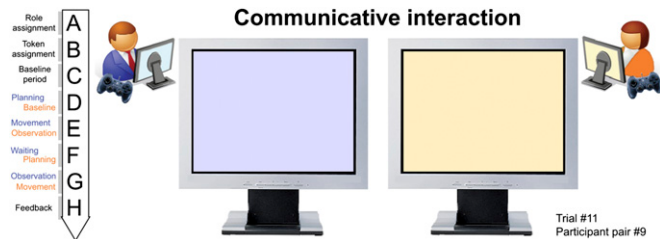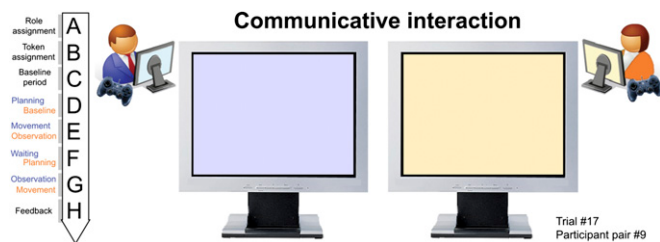

**Movie S5.** Interactive behaviors evoked during trials 9, 11, and 17 of the communicative task by the same pair of participants (pair 9). A particular problem type can induce different communicative behaviors in different trials, depending on the current conversational context of a pair. For instance, in trial 9, both participants' tokens are triangular, and the Communicator tries to convey to the Addressee her goal configuration by matching it with his own token (A). This strategy, however, does not apply to trial 11, where each player controls a differently shaped token, forcing them to negotiate a different strategy. In this case, the Communicator chooses to wiggle to indicate the orientation of the triangle, and the meaning of this behavior is understood by the Addressee (B). This shared symbol is also used in trial 17 (C), despite the fact that the problem presented in this trial is similar to the problem of trial 9 and that, in trial 9, a different communicative behavior was used (A).

- [Movie S5 \(A\)](#)
- [Movie S5 \(B\)](#)
- [Movie S5 \(C\)](#)
